# Supplementary material for: Glucose Variability Assessed by Low Blood Glucose Index Is Predictive of Hypoglycemic Events in Patients With Type 1 Diabetes Switched to Pump Therapy
Source: Oxford University Press journal article supplement (doi:10.2337/dc12-2058), 2013-02-13

SUPPLEMENTARY DATA

**Supplementary Table 1.** Detailed univariate and multivariate regression analysis.

| Predictive variable                                      | Outcomes              |                                   |                               |                                   |                              |                                 |                               |                               |
|----------------------------------------------------------|-----------------------|-----------------------------------|-------------------------------|-----------------------------------|------------------------------|---------------------------------|-------------------------------|-------------------------------|
|                                                          | A1C                   |                                   | Δ hypoglycemia*<br><50 mg/dL  |                                   | Δ hypoglycemia*<br><60 mg/dL |                                 | Δ hypoglycemia*<br><70 mg/dL  |                               |
|                                                          | <i>R</i> <sup>2</sup> | <i>P</i>                          | <i>R</i> <sup>2</sup>         | <i>P</i>                          | <i>R</i> <sup>2</sup>        | <i>P</i>                        | <i>R</i> <sup>2</sup>         | <i>P</i>                      |
| Age                                                      | 0.038                 | 0.17                              | 0.001                         | 0.83                              | 0.001                        | 0.86                            | 0.003                         | 0.70                          |
| Type 1 diabetes duration                                 | 0.056<br>(0.056)<br>§ | 0.091<br>(0.0093) <sup>§</sup>    | 0.001                         | 0.82                              | 0.005                        | 0.62                            | 0.005                         | 0.63                          |
| A1C on MDI                                               | 0.403<br>(0.403)<br>§ | 0.00001<br>(0.00001) <sup>§</sup> | 0.027                         | 0.25                              | 0.014                        | 0.41                            | 0.008                         | 0.54                          |
| Mean blood glucose on MDI <sup>†</sup>                   | 0.051                 | 0.11                              | 0.086                         | 0.034                             | 0.106                        | 0.017                           | 0.061                         | 0.077                         |
| Blood glucose <70 mg/dL (3.9 mmol/L) on MDI <sup>†</sup> | 0.028                 | 0.24                              | 0.106                         | 0.017                             | 0.144                        | 0.0044                          | 0.104                         | 0.54                          |
| Blood glucose <60 mg/dL (3.3 mmol/L) on MDI <sup>†</sup> | 0.015                 | 0.39                              | 0.140                         | 0.0052                            | 0.148                        | 0.0038                          | 0.061                         | 0.078                         |
| Blood glucose <50 mg/dL (2.8 mmol/L) on MDI <sup>†</sup> | 0.063                 | 0.43                              | 0.340<br>(0.340) <sup>§</sup> | 0.00001<br>(0.00001) <sup>§</sup> | 0.165                        | 0.002                           | 0.061                         | 0.076                         |
| SMBG measurements per day on MDI <sup>†</sup>            | 0.006                 | 0.59                              | 0.023                         | 0.29                              | 0.019                        | 0.34                            | 0.033                         | 0.2                           |
| Mean SD of blood glucose on MDI <sup>†</sup>             | 0.051                 | 0.81                              | 0.001                         | 0.81                              | 0.001                        | 0.87                            | 0.003                         | 0.7                           |
| %CV on MDI <sup>†</sup>                                  | 0.084                 | 0.036                             | 0.010                         | 0.48                              | 0.156                        | 0.0029                          | 0.111                         | 0.014                         |
| LBGI on MDI <sup>†</sup>                                 | 0.126                 | 0.0084                            | 0.235                         | 0.00013                           | 0.195<br>(0.195)<br>§        | 0.0007<br>(0.0013) <sup>§</sup> | 0.111<br>(0.111) <sup>§</sup> | 0.014<br>(0.018) <sup>§</sup> |
| HBGI on MDI <sup>†</sup>                                 | 0.126                 | 0.81                              | 0.057                         | 0.089                             | 0.072                        | 0.054                           | 0.038                         | 0.17                          |
| ADRR on MDI <sup>†</sup>                                 | 0.015                 | 0.43                              | 0.017                         | 0.4                               | 0.018                        | 0.38                            | 0.020                         | 0.36                          |

\*Δ hypoglycemia is the difference in number of hypoglycemic events on CSII versus MDI. <sup>†</sup>All data derived from SMBG were calculated from the 1-month period preceding the visit. <sup>§</sup>Results in parentheses are of the stepwise multivariate analysis.

SUPPLEMENTARY DATA

**Supplementary Figure 1.** Panel A shows the regression line of baseline A1C for prediction of A1C change on CSII. Panel B shows the correlation between baseline A1C and baseline LBGI. Dotted lines represent 95% CI.

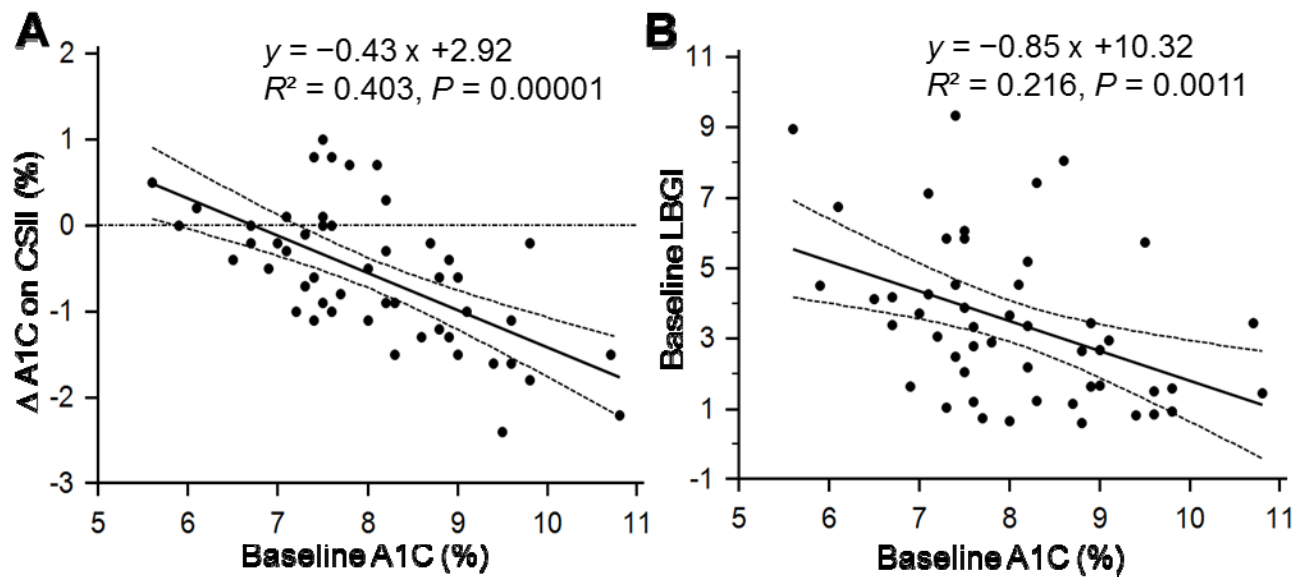

Supplement: dc122058supplementarydata.pdf [file dc122058supplementarydata.pdf]
